# Supplementary material for: Usual dietary intake and change in DNA methylation over years: EWAS in KORA FF4 and KORA fit
Source: Front Nutr. 2024 Jan 5;10:1295078. doi: 10.3389/fnut.2023.1295078 (PMC10799384; doi:10.3389/fnut.2023.1295078)
Supplement: Supplementary file 1 [file Table_1.xlsx]

## Sheet: Header 
probeID	CpG identifier
BETA_interactTimepointFIT	Effect size of the interaction term
SE_interactTimepointFIT	Standard error of the interaction term
P_VAL_interactTimepointFIT_bacon	Bacon corrected p-value of the interaction term
CHR	Chromosome
UCSC_RefGene_Name	Target gene names from the UCSC database
UCSC_RefGene_Group	Describing CpG position. TSS1500 = 200-1500 bases upstream of the Transcription start site (TSS); 5-UTR = Within the 5’ untranslated region, between the TSS and the ATG start site; Body = Between the ATG and stop codon, irrespective of the presence of introns, exons, TSS or promoters; 3’UTR = Between the stop codon and the poly A signal; ExonBnd = Exon Boundaries
Relation_to_UCSC_CpG_Island	The location of the CpG relative to the CpG Island. Shore = 0-2kb from Island; Shelf = 2-4kb from Island; N = Upstream (5’) of CpG Island; S = Downstream (3’) of CpG Island (https://knowledge.illumina.com/microarray/general/microarray-general-reference_material-list/000001568?langsel=/fo/ )

## Sheet: Cabbage-vegetables
Supplementary Table 1: Bacon corrected results for GEE EWAS
probeID	BETA_interactTimepointFIT	SE_interactTimepointFIT	P_VAL_interactTimepointFIT_bacon	CHR	UCSC_RefGene_Name	UCSC_RefGene_Group	Relation_to_UCSC_CpG_Island
cg25441661	0.000883	0.00015	1.22386e-08	5	ADAMTS2	Body;Body	-

## Sheet: Cream
Supplementary Table 1: Bacon corrected results for GEE EWAS
probeID	BETA_interactTimepointFIT	SE_interactTimepointFIT	P_VAL_interactTimepointFIT_bacon	CHR	UCSC_RefGene_Name	UCSC_RefGene_Group	Relation_to_UCSC_CpG_Island
cg11613902	0.003283	0.000451	5.78634e-09	10	TLL2	Body	-
cg07376134	0.002435	0.000358	5.15684e-08	16	GSG1L	TSS1500	Island
cg11811840	-0.002251	0.000323	1.86154e-08	2	UGT1A10	Body;1stExon;Body;Body;Body;Body;Body;Body;Body;Body	-

## Sheet: Folic-acid
Supplementary Table 1: Bacon corrected results for GEE EWAS
probeID	BETA_interactTimepointFIT	SE_interactTimepointFIT	P_VAL_interactTimepointFIT_bacon	CHR	UCSC_RefGene_Name	UCSC_RefGene_Group	Relation_to_UCSC_CpG_Island
cg26942952	0.000176	3.2e-05	5.21605e-08	12	-	-	S_Shore

## Sheet: Fruit-vegetables
Supplementary Table 1: Bacon corrected results for GEE EWAS
probeID	BETA_interactTimepointFIT	SE_interactTimepointFIT	P_VAL_interactTimepointFIT_bacon	CHR	UCSC_RefGene_Name	UCSC_RefGene_Group	Relation_to_UCSC_CpG_Island
cg01022859	0.000152	2.7e-05	6.37824e-08	17	MRC2	Body	-

## Sheet: Grain-products
Supplementary Table 1: Bacon corrected results for GEE EWAS
probeID	BETA_interactTimepointFIT	SE_interactTimepointFIT	P_VAL_interactTimepointFIT_bacon	CHR	UCSC_RefGene_Name	UCSC_RefGene_Group	Relation_to_UCSC_CpG_Island
cg02780269	0.000364	6.6e-05	5.88085e-08	17	SECTM1	TSS1500	Island

## Sheet: Spirits
Supplementary Table 1: Bacon corrected results for GEE EWAS
probeID	BETA_interactTimepointFIT	SE_interactTimepointFIT	P_VAL_interactTimepointFIT_bacon	CHR	UCSC_RefGene_Name	UCSC_RefGene_Group	Relation_to_UCSC_CpG_Island
cg00317609	-0.003566	0.000511	5.84799e-08	1	-	-	-
cg15125076	-0.002754	0.000385	2.75869e-08	14	-	-	-
cg08021411	-0.00341	0.000426	4.83929e-10	17	-	-	-
cg17177779	0.006985	0.000927	5.13016e-09	17	-	-	-
cg23790387	-0.004783	0.000595	4.17144e-10	2	-	-	S_Shelf
cg04192740	0.002953	0.000344	3.0026e-11	5	STK10	Body	-
cg21765117	-0.003116	0.00043	1.79893e-08	4	GBA3	Body;Body;Body;Body;Body;Body	-
cg08694574	0.007708	0.000804	1.08422e-13	16	-	-	S_Shelf
cg02697402	-0.003155	0.000437	2.03136e-08	16	-	-	-
cg08386859	0.003432	0.00047	1.53101e-08	12	TMEM106C	Body;Body;Body;Body	S_Shelf
cg07644026	-0.009691	0.001116	1.51059e-11	1	LCE1E	TSS1500	-
cg08211801	-0.001456	0.000209	5.78338e-08	19	-	-	Island
cg26170499	0.0032	0.000445	2.44931e-08	17	RPTOR	Body;Body	-
cg22021765	-0.002883	0.000394	1.33024e-08	22	GGT1	5'UTR;Body	N_Shelf
cg17700903	0.008506	0.000841	4.55093e-15	1	FMN2	TSS1500;TSS1500	N_Shore
cg12783110	-0.000988	0.000126	1.07826e-09	2	NDUFS1	TSS1500;5'UTR;5'UTR;5'UTR;1stExon;TSS1500;TSS1500;TSS1500;TSS1500	Island
cg04988209	-0.003155	0.000452	5.69598e-08	12	RMST	Body	-
cg13955707	-0.002823	0.000341	1.21744e-10	16	VAC14	Body	-
cg02345939	-0.004356	0.000613	3.31083e-08	21	MRAP	TSS1500;TSS1500;TSS1500	-
cg00804303	0.005595	0.000775	2.1919e-08	7	NRCAM	Body;Body;Body;Body;Body	-
cg06386723	-0.004693	0.000547	2.66608e-11	3	CCDC37-AS1	Body;Body;Body;TSS1500	N_Shore
cg06851919	-0.001079	0.000151	2.90044e-08	9	SMARCA2	TSS200;TSS200;Body;Body;Body;Body;Body	-
cg02931526	-0.002499	0.000297	5.91547e-11	2	AGAP1	Body;Body	-
cg26500934	-0.003128	0.000403	1.69055e-09	2	THAP4	Body	-
cg20997359	-0.004308	0.000456	2.01949e-13	5	MAP1B	Body	-
cg12823072	-0.003622	0.000472	2.37576e-09	8	SCARA5	5'UTR	-
cg15639910	-0.001522	0.000208	1.2171e-08	11	HCCA2	Body	Island
cg13839439	-0.004595	0.00064	2.33797e-08	12	-	-	N_Shore
cg01092890	-0.003157	0.000431	1.2474e-08	10	STK32C	Body	S_Shelf
cg18394533	-0.004893	0.000593	1.45103e-10	6	MOCS1	TSS200;TSS200	S_Shore
cg03664710	0.005856	0.000834	5.18812e-08	12	-	-	-
cg26107333	-0.003259	0.000464	4.83741e-08	12	TSPAN9	5'UTR;5'UTR	Island
cg06309063	0.002486	0.000342	1.74712e-08	20	MOCS3	TSS1500;TSS200	Island
cg09112682	-0.001606	0.00019	5.30731e-11	16	CLN3	Body;Body	Island
cg08217191	-0.003211	0.000447	2.28855e-08	10	LDB3	Body;Body;Body;Body;Body;Body	-
cg17625893	-0.003306	0.000468	3.96292e-08	14	-	-	S_Shore
cg23894058	-0.006126	0.000793	1.88769e-09	19	KLK12	Body;Body;Body	S_Shelf
cg14144305	-0.003872	0.000553	5.34421e-08	11	ALX4	Body	Island
cg14325874	-0.003242	0.000432	5.6954e-09	18	GNAL	Body;Body;Body	-
cg08053420	0.004821	0.000652	9.99964e-09	14	RD3L	TSS1500;Body	-
cg16609645	0.004483	0.000605	9.10999e-09	3	-	-	-
cg21134946	0.005573	0.00071	1.15048e-09	2	-	-	-
cg06122269	0.008936	0.001095	2.52425e-10	17	CD300A	TSS1500;TSS1500	-
cg00486126	-0.00259	0.000357	1.72331e-08	17	PROCA1	Body;Body;Body;Body;5'UTR;5'UTR	N_Shelf
cg15208393	-0.002317	0.000327	3.57009e-08	20	SS18L1	5'UTR;Body;Body;Body	-
cg13335775	0.007085	0.000924	2.7525e-09	12	LOC643711	TSS1500	-
cg12440311	-0.002296	0.000327	4.76159e-08	5	C5orf66	5'UTR	-
cg18409914	0.006685	0.000943	3.85345e-08	5	EBF1	Body;Body;Body	-
cg06052323	0.006347	0.000811	1.31082e-09	6	ZDHHC14	Body;Body	-
cg03184776	0.005512	0.000731	5.03378e-09	17	MIR2117	TSS200	-
cg19299920	0.003272	0.000448	1.5473e-08	15	NPAP1	TSS200	N_Shore
cg22716127	-0.00221	0.000296	6.46671e-09	6	SMAP1	Body;Body	Island
cg22415969	0.002259	0.000313	2.24348e-08	3	NEK10	TSS200	Island
cg19229291	0.00545	0.000652	9.41417e-11	5	-	-	-
cg02827154	0.003986	0.000537	8.71173e-09	6	MUC21	Body	-
cg09319797	0.003419	0.000385	5.94962e-12	16	TNFRSF17	3'UTR	-
cg12073481	-0.002814	0.000382	1.04809e-08	4	WDFY3	3'UTR;3'UTR	-
cg25970082	-0.001659	0.000216	2.28185e-09	1	WARS2	1stExon;5'UTR;5'UTR;1stExon	Island
cg14949948	-0.005381	0.000764	4.35501e-08	9	FAM120AOS	TSS200;Body;Body;Body;Body	S_Shore
cg18119851	0.007165	0.00097	1.03459e-08	14	STON2	Body;Body	-
cg04896539	0.007633	0.001001	3.46282e-09	4	SORBS2	1stExon;5'UTR;5'UTR;5'UTR;5'UTR;5'UTR;5'UTR;5'UTR	-
cg21615440	0.002029	0.000254	6.09552e-10	1	SLC2A1	TSS200;Body	S_Shore
cg12270357	-0.005133	0.000698	1.11374e-08	3	GRAMD1C	TSS1500	N_Shore
cg07981355	0.001954	0.00028	6.53494e-08	10	CNNM2	3'UTR;3'UTR	-
cg13693517	0.005696	0.000817	6.62703e-08	20	TASP1	5'UTR	N_Shelf
cg15621493	0.005539	0.000593	4.58813e-13	2	-	-	-
cg06755139	0.003498	0.000497	4.79998e-08	1	TMEM61	Body	S_Shelf
cg04770238	-0.003063	0.000433	3.85407e-08	17	-	-	-
cg09447219	0.003844	0.000468	1.96106e-10	4	-	-	S_Shore
cg20178893	0.003862	0.000508	3.70634e-09	1	PBX1	Body;Body;Body	-
cg17769389	0.007651	0.000999	2.88362e-09	22	-	-	-
cg07363270	-0.006253	0.000874	2.62988e-08	2	LOC440925	Body	N_Shore
cg18111865	0.004092	0.000571	2.84169e-08	15	-	-	N_Shelf
cg11278621	-0.005984	0.000835	2.4992e-08	7	-	-	N_Shelf
ch.6.1239582F	0.002957	0.000408	1.92591e-08	6	TRAM2	Body	-
cg18443629	0.006987	0.000952	1.29547e-08	18	GALR1	TSS1500	N_Shore
cg16293853	-0.005583	0.000691	3.39588e-10	11	NLRP6	Body	S_Shore
cg13681468	0.009482	0.001271	7.3314e-09	4	GPRIN3	5'UTR	N_Shore
cg06951564	-0.003384	0.000481	4.42029e-08	1	-	-	-
cg24445996	0.002076	0.00028	8.77906e-09	18	ZNF24	5'UTR	N_Shore
cg05255762	-0.003387	0.000399	4.27953e-11	10	-	-	-
cg15523863	-0.005643	0.000712	7.20583e-10	20	-	-	-
cg00958197	0.009538	0.001258	4.12257e-09	7	CREB5	TSS1500;5'UTR;Body	-
cg20815063	0.001888	0.000266	3.89727e-08	11	ANKRD49	5'UTR;TSS1500;TSS1500	Island
cg24074149	-0.013859	0.001671	1.14829e-10	5	PRELID2	Body;Body;Body	-
cg21230392	0.00227	0.000256	6.53657e-12	4	PROM1	1stExon;1stExon;5'UTR;1stExon;5'UTR;5'UTR;1stExon;5'UTR;5'UTR;5'UTR;1stExon;5'UTR	-
cg14266410	0.007784	0.000943	1.57146e-10	14	-	-	N_Shelf
cg11070030	-0.006262	0.000747	7.10812e-11	12	-	-	-
cg09319852	-0.003098	0.000417	7.47888e-09	3	SLC25A20	Body	-
cg13245380	0.008489	0.001201	4.27796e-08	14	-	-	-
cg12991369	-0.005054	0.000726	6.20147e-08	9	DDX31	Body	-
cg26902746	0.002786	0.000353	9.39397e-10	1	-	-	-
cg09147822	0.003383	0.000468	2.03789e-08	14	TTLL5	Body	-
cg11466487	-0.002828	0.000381	8.14958e-09	14	RNF31	Body;Body	-
cg05308125	0.00376	0.000484	1.71079e-09	2	-	-	-
cg23904088	0.009907	0.001243	6.55678e-10	15	IQCH	Body;Body;Body;Body;Body	-
cg18388393	0.010997	0.001338	1.85409e-10	8	-	-	-
cg25746903	-0.002526	0.000362	5.87242e-08	1	-	-	-
cg17999820	0.006638	0.000942	4.76444e-08	11	C11orf83	TSS1500;5'UTR	N_Shore
cg20125569	-0.001513	0.000216	4.92209e-08	15	MEX3B	Body	Island
cg05429397	-0.003127	0.000438	2.95884e-08	2	SNTG2	Body	-
cg20400592	0.006404	0.000681	3.12233e-13	13	DLEU7	TSS200	Island
cg05335492	0.004353	0.000567	2.61578e-09	16	-	-	N_Shelf
cg19762734	-0.005537	0.000691	4.79359e-10	13	-	-	-
cg15428653	-0.001602	0.000227	4.07576e-08	9	ABCA2	TSS1500;5'UTR;TSS200	Island
cg13937654	-0.002069	0.000282	1.13818e-08	5	TRIO	Body	-
cg20938969	-0.002755	0.000391	4.22581e-08	11	USP35	5'UTR	N_Shore
cg17353721	-0.002938	0.000387	3.46431e-09	7	INTS1	Body	Island
cg14026583	-0.002788	0.000373	6.41497e-09	16	-	-	-
cg15213605	-0.002969	0.000424	5.42217e-08	16	COG4	TSS200;TSS1500	Island
cg16530956	-0.003226	0.000406	6.45836e-10	20	ZFP64	Body;Body;Body;Body	Island
cg15338019	0.006306	0.000889	3.85885e-08	18	SPIRE1	5'UTR;Body;Body	-
cg23576941	0.004527	0.000625	2.01017e-08	20	-	-	S_Shore
cg11588610	-0.002667	0.000329	3.1206e-10	11	-	-	S_Shore
cg05013692	0.007244	0.001036	6.05059e-08	16	ZNF423	Body;Body	-
cg08771722	0.003872	0.000422	1.12128e-12	2	-	-	-
cg03656872	-0.003303	0.000465	3.27205e-08	4	-	-	-
cg04371567	0.003912	0.000503	1.67419e-09	4	-	-	-
cg23788525	-0.002936	0.000384	2.75758e-09	9	RUSC2	Body;Body;Body	-
cg26132671	0.010527	0.001429	1.12596e-08	3	ARIH2	Body	-
cg20011552	-0.004387	0.000541	2.99829e-10	10	-	-	S_Shore
cg09125248	0.004093	0.000516	8.0657e-10	13	-	-	-
cg10260031	-0.003766	0.00042	3.20497e-12	19	NFIC	Body;Body;Body;Body;Body	-
cg22297750	-0.007636	0.000986	1.762e-09	6	ZBTB2	Body	-
cg18353563	0.002688	0.000364	1.00124e-08	3	ABTB1	TSS1500;Body;TSS1500;TSS1500	N_Shore
cg03511031	-0.004213	0.000509	1.27851e-10	7	PTPRN2	Body;Body;Body	-
cg19710451	-0.006679	0.000884	4.25368e-09	17	HOXB4	Body	Island
cg06162304	0.008563	0.00111	2.22066e-09	15	LYSMD2	TSS1500;5'UTR;5'UTR	S_Shore
cg11285912	-0.003038	0.000429	3.69412e-08	10	CTBP2	Body;Body;Body	S_Shore
cg08870763	-0.005722	0.000578	1.52687e-14	8	DLC1	Body;Body	-
cg20711621	0.00407	0.000563	2.12531e-08	17	C17orf79	TSS1500	Island
cg17255821	0.004681	0.000637	1.23505e-08	16	-	-	-
cg00829607	0.011218	0.001458	2.45678e-09	16	-	-	-
cg20133285	-0.003348	0.000411	2.56795e-10	2	-	-	-
cg08562409	-0.002114	0.000299	3.83344e-08	6	-	-	S_Shore
cg20108636	0.003858	0.000541	3.30931e-08	10	-	-	-
cg06253903	0.00451	0.00063	2.93178e-08	8	FAM167A	Body;Body	-
cg17546878	0.003806	0.000531	2.79982e-08	6	FYN	5'UTR;5'UTR	-
cg11031526	0.003564	0.000497	2.66423e-08	15	BMF	Body;Body;Body;Body	-
cg05780035	-0.002589	0.000342	3.79196e-09	19	THOP1	Body	Island
cg07943079	0.006732	0.000926	1.77448e-08	9	TRPM3	Body;Body;Body;Body;Body;Body;Body	-
cg13969171	-0.002684	0.000371	1.91704e-08	9	-	-	S_Shelf
cg17737146	0.013022	0.001362	1.23014e-13	3	LRRC34	Body	Island
cg11874882	0.005963	0.000828	2.39941e-08	17	ACCN1	Body	-
cg25977683	0.004655	0.000624	7.54199e-09	4	MEPE	5'UTR;5'UTR;5'UTR;ExonBnd;ExonBnd;ExonBnd;ExonBnd;ExonBnd;1stExon;Body;Body	-
cg07038909	0.005303	0.000636	1.04067e-10	6	ZBTB2	5'UTR	-
cg08816688	-0.004809	0.000593	2.99743e-10	9	MAPKAP1	Body;Body;Body;Body;Body	-
cg17717448	0.006168	0.000882	5.97801e-08	13	-	-	-
cg12245358	0.009742	0.001114	1.22105e-11	4	AGPAT9	Body;Body;Body	-
cg25333826	-0.002165	0.000256	5.26687e-11	2	RTN4	Body;Body;Body;5'UTR	N_Shore
cg26169081	-0.005397	0.000665	2.8859e-10	10	CAMK1D	Body;Body	-
cg02376703	0.001183	0.000127	5.66341e-13	7	EPHA1	TSS200	-
cg08204843	0.001552	0.000221	5.41235e-08	3	BDH1	3'UTR;3'UTR;3'UTR	-
cg27442805	-0.002137	0.000272	1.03127e-09	6	-	-	S_Shore
cg16435591	0.004283	0.000552	1.77709e-09	15	AKAP13	ExonBnd;ExonBnd;ExonBnd;Body;Body;Body	-
cg12525707	-0.002257	0.000325	6.51463e-08	7	-	-	-
cg10390228	0.001263	0.000144	1.18949e-11	11	SF1	Body;Body;Body;Body	N_Shore
cg14826425	0.002218	0.000294	5.31935e-09	7	-	-	Island
cg08252533	0.001475	0.000199	9.22676e-09	2	UBE2F	TSS200	Island
cg06758591	-0.002572	0.000337	3.05948e-09	1	FAM5B	TSS1500	Island
cg24607725	0.003805	0.000544	5.91016e-08	12	ARL6IP4	1stExon;1stExon;1stExon;1stExon;1stExon;1stExon;5'UTR;Body;Body	Island
cg06496261	0.001991	0.000235	5.62787e-11	2	PDE11A	Body;TSS200	N_Shore
cg23130097	-0.00484	0.000564	2.56157e-11	8	MAL2	TSS200	Island
cg16602799	-0.000838	0.000116	1.74887e-08	13	ATP12A	5'UTR;1stExon	Island
cg10177647	0.00166	0.00023	2.19094e-08	16	FTSJD1	5'UTR;1stExon;TSS200	Island
cg09440812	-0.000701	9.8e-05	3.10648e-08	11	RCE1	TSS1500;TSS1500;Body	Island
cg25479306	0.001425	0.000139	1.64472e-15	11	VPS37C	TSS200	Island
cg07255356	0.000796	0.000113	4.65783e-08	5	MARCH6	1stExon;5'UTR	Island
cg09659208	-0.005399	0.00072	5.6892e-09	10	DIP2C	Body	-
cg05284480	0.001631	0.000189	2.51082e-11	16	RNPS1	TSS1500;TSS1500	Island
cg10298173	-0.001414	0.000193	1.25181e-08	3	CHCHD4	1stExon;1stExon;5'UTR;5'UTR;TSS200	Island
cg13849454	0.001097	0.000155	4.1559e-08	9	-	-	Island
cg15098182	-0.001139	0.000154	9.1323e-09	9	ZER1	TSS200	Island
cg20658450	-0.003571	0.000493	1.81932e-08	5	-	-	-
cg18881377	-0.00091	0.000118	1.78836e-09	12	C12orf62	TSS200	Island
cg11895727	-0.001669	0.000239	5.75956e-08	6	MICA	Body	Island
cg22808989	0.002471	0.000352	5.4967e-08	20	PLCG1	5'UTR;5'UTR;1stExon;1stExon;Body	Island
cg27214687	0.002464	0.000313	9.93944e-10	2	GPC1	Body	-
cg08447739	-0.006794	0.000923	1.06783e-08	10	HTRA1	TSS1500	Island
cg04731518	-0.004072	0.000426	1.13974e-13	2	PQLC3	Body	-
cg22005100	-0.000952	0.000126	4.28079e-09	17	CEP131	TSS200;TSS200	Island
cg26873457	0.002323	0.000296	1.12579e-09	10	DIP2C	Body	-
cg03490288	-0.001866	0.000259	2.26865e-08	11	DHCR7	Body;Body	Island
cg19092317	-0.002286	0.00029	9.45177e-10	5	-	-	N_Shore
cg04155756	0.001908	0.000273	6.11145e-08	4	TBC1D14	Body;TSS200;Body	Island
cg04439376	0.010032	0.001049	1.20636e-13	2	TMEM87B	TSS1500	Island
cg24654205	0.002387	0.000233	2.06082e-15	8	COMMD5	TSS200;TSS1500;TSS1500;TSS1500	S_Shore
cg03694580	0.006498	0.000805	3.94366e-10	7	MAD1L1	5'UTR;5'UTR;5'UTR	N_Shore
cg16921310	-0.002493	0.000347	2.40633e-08	12	ASCL1	5'UTR;1stExon	Island
cg25175887	-0.002876	0.00036	5.43158e-10	12	TSPAN9	5'UTR;5'UTR	-
cg22603815	-0.001011	0.000141	2.79204e-08	1	TRIM46	TSS1500;Body	N_Shore
cg04166546	0.003122	0.000379	1.62098e-10	6	DHX16	1stExon;1stExon;5'UTR;5'UTR	Island
cg11491515	-0.001435	0.000204	4.56268e-08	19	ZNF573	TSS200;TSS200;TSS200;TSS200;TSS200	Island

## Sheet: Sugar-sweetened-beverages
Supplementary Table 1: Bacon corrected results for GEE EWAS
probeID	BETA_interactTimepointFIT	SE_interactTimepointFIT	P_VAL_interactTimepointFIT_bacon	CHR	UCSC_RefGene_Name	UCSC_RefGene_Group	Relation_to_UCSC_CpG_Island
cg02620443	6.5e-05	1.1e-05	1.45599e-08	12	SLC6A13	ExonBnd;ExonBnd;Body;Body	-
